# Supplementary material
Source: PubMed Central journal article supplement (PMC9246960)
Supplement: NIHMS1787519-supplement-Supplemental_Publication_Material.pdf [file NIHMS1787519-supplement-Supplemental_Publication_Material.pdf]

## SUPPLEMENTARY MATERIAL

### + iDEF INVESTIGATORS

**EXECUTIVE COMMITTEE:** Magdy Selim, MD, PhD (the study Principal Investigator and chair); Sharon Yeatts, PhD (Biostatistician and Principal Investigator of the Statistics and Data Management Center); Yuko Palesch, PhD (Biostatistician); Lydia Foster, MS (Biostatistician); Jessica Griffin, BS (Project Manager); Aaron Perlmutter, MPH, MSW (Project Manager), Casey Norton (Study Coordinator), MS (Catherine Dillon, CCRP (the Supervisory Data Manager); Andre Thornhill (the Data Manager); and Claudia Moy, PhD (NINDS-appointed liaison).

**ADVISORY COMMITTEE:** Steven Greenberg, MD, PhD; Lewis Morgenstern, MD; Daniel Hanley, MD; and Guohua Xi, MD, PhD

**INDEPENDENT MEDICAL SAFETY MONITORS:** Thomas P Bleck, MD; Robert Balk, MD

**THE STATISTICS AND DATA MANAGEMENT CENTER - DEPARTMENT OF PUBLIC HEALTH SCIENCES - COLLEGE OF MEDICINE AT THE MEDICAL UNIVERSITY OF SOUTH CAROLINA:** Sharon Yeatts, PhD (Principal Investigator); Yuko Palesch, PhD; Lydia Foster, MS; Jessica Griffin, BS, CCRP; Andre Thornhill, MA; Aaron Perlmutter, MPH, MSW; Catherine Dillon, MS; Wenle Zhao, PhD; Jaemyung Kim, MBA.

**THE CLINICAL COORDINATION CENTER AND CENTRAL IMAGING LABORATORY – BETH ISRAEL DEACONESS MEDICAL CENTER:**

Magdy Selim, MD (Principal Investigator); Sandeep Kumar, MD; Casey Norton, BS; Megan Farinella, MS; Erica Siwila-Sackman, MD; Caroline Feigert, MS; Gottfried Schlaug, MD; Jasmine Wang, BA.

**NATIONAL INSTITUTE OF NEUROLOGICAL DISORDERS AND STROKE OF THE NATIONAL INSTITUTES OF HEALTH (NINDS) REPRESENTATIVES:** Clinton Wright, MD (Director, Division of Clinical Research, NINDS); Claudia Moy, PhD (Project Scientist); Scott Janis, PhD (Program Official); Peter Gilbert, MS (DSMB Liaison)

**NINDS-APPOINTED DATA SAFETY AND MONITORING BOARD:** Carlos S Kase, MD (Chair); Shannon Carson, MD; Matthew Flaherty, MD; Craig M Kessler, MD; Leslie A McClure, PhD

**DEPARTMENT OF HEALTH AND HUMAN SERVICES SUPPLY SERVICE CENTER AT PERRY POINT:** Donna Bannon, CPHT  
**NINDS STROKENET:** Joseph Broderick, MD; Amy Dill, PharmD, BCPS

### SITE PRINCIPAL INVESTIGATORS AND COORDINATORS (IN ORDER OF HIGHEST ENROLLMENTS)

| SITE NAME                                                  | LOCAL INVESTIGATORS<br>(SITE PRINCIPAL INVESTIGATOR AND STUDY COORDINATOR) |
|------------------------------------------------------------|----------------------------------------------------------------------------|
| Oregon Health and Science University Hospital              | Wayne Clark, MD; Monica Dolan                                              |
| San Francisco General Hospital                             | Vineeta Singh, MD                                                          |
| Duke University Hospital                                   | Michael (Luke) James, MD; Erlinda Yeh                                      |
| Yale New Haven Hospital                                    | Kevin Sheth, MD; Kimberly Kunze                                            |
| University of Massachusetts Memorial Medical Center        | Susanne Muehlschlegel, MD; Iryna Nieto                                     |
| New York Presbyterian / Columbia University Medical Center | Jan Claassen, MD; Cristina Falo                                            |
| University of North Carolina                               | David Huang, MD; Anne Beckwith                                             |
| Hospital of the University of Pennsylvania                 | Steven R Messe, MD; Melissa Yates                                          |
| Jackson Memorial Hospital                                  | Kristine O'Phelan, MD; Andrea Escobar                                      |

|                                                      |                                                |
|------------------------------------------------------|------------------------------------------------|
| Harborview Medical Center                            | Kyra Becker, MD; Patricia Tanzi                |
| University of Texas Health Science Center in Houston | Nicole R Gonzales, MD; Chad Tremont            |
| Stanford University Medical Center                   | Chitra Venkatasubramanian, MD; Rosita Thiessen |
| University of Calgary                                | Michael Hill, MD; Supriya Save                 |
| Enfant-Jesus Hospital                                | Steven Verreault, MD; Karin Collard            |
| University Hospitals Case Medical Center             | Michael DeGeorgia, MD; Valerie Cwiklinski      |
| Rhode Island Hospital                                | Bradford Thompson, MD; Lesley Wasilewski       |
| Medical University of South Carolina                 | Charles Andrews, MD; Robert Burfeind           |
| Ohio State University Wexner Medical Center          | Michel Torbey, MD; Mohammad Hamed              |
| Beth Israel Deaconess Medical Center                 | Magdy Selim, MD; Casey Norton                  |
| University of Alberta                                | Kenneth Butcher, MD; Leka Sivakumar            |
| Henry Ford Hospital                                  | Nicolaou P Varelas, MD; Kathleen Mays-Wilson   |
| University of Iowa Medical Center                    | Enrique Leira, MD; Heena Olalde                |
| University of Florida                                | Scott Silliman, MD; Rhonda Calhoun             |
| Mount Sinai Medical Center                           | Neha Dangayach, MD; Ricardo Renvill            |
| Montefiore Medical Center                            | Rishi Malhotra, MD; Kristina Kordesch          |
| New York University Langone Medical Center           | Aaron S Lord, MD; Thomas Calahan               |
| Johns Hopkins Hospital                               | Romergrzyko Geocadin, MD; Michelle Parish      |
| Saint Joseph's Hospital and Medical Center           | James Frey, MD; Mary Harrigan                  |
| New York Presbyterian/Weil Cornell Medical Center    | Dana Leifer, MD; Ryna Mathias                  |
| Loyola University                                    | Michael Schneck, MD; Tara Bernier              |
| Bellevue Hospital                                    | Aaron S Lord, MD; Thomas Calahan               |
| Baptist Hospital, Miami, FL                          | Sergio Gonzales-Arias, MD; Josette Elysee      |
| Rush University Medical Center                       | George Lopez, MD; Josephine Volgi              |
| Hartford Hospital                                    | Robert Brown, MD; Sara Jasak                   |
| Dalhousie University                                 | Stephen Phillips, MD; Judith Jarrett           |
| The Cleveland Clinic                                 | Joao Gomes, MD; Moneen McBride                 |
| University of Maryland Medical Center                | Francois Aldrich, MD; Charlene Aldrich         |
| Tufts Medical Center                                 | Joshua Kornbluth, MD; Michelle Bettle          |
| Massachusetts General Hospital                       | Joshua Goldstein, MD; Gregory Tirrell          |
| Abington Memorial Hospital                           | Qaisar Shaw, MD; Karin Jonczak                 |

**Supplementary Table 1: Number of Patients with Missing Outcomes.**

| <b>Number of timepoints with missing mRS</b> | <b>Number of subjects</b> | <b>Percent of subjects</b> |
|----------------------------------------------|---------------------------|----------------------------|
| 0                                            | 260                       | 89.35                      |
| 1                                            | 22                        | 7.56                       |
| 2                                            | 5                         | 1.72                       |
| 3                                            | 3                         | 1.03                       |
| 4                                            | 1                         | 0.34                       |

**Supplementary Table 2:** Comparison of Baseline Clinical and Demographic Characteristics of Patients with Missing Outcomes, overall and by Treatment Group, and Patients with Completed Outcome Assessments at all Timepoints.

|                                             |                                        | All - Missing<br>n=31 | All - Not Missing<br>n=260 | DFO - Missing<br>n=17 | DFO - Not Missing<br>n=127 | Placebo - Missing<br>n=14 | Placebo - Not Missing<br>n=133 |
|---------------------------------------------|----------------------------------------|-----------------------|----------------------------|-----------------------|----------------------------|---------------------------|--------------------------------|
| Age, Median (Min, Max)                      |                                        | 55 (31, 79)           | 61 (22, 80)                | 51 (31, 77)           | 60 (23, 80)                | 62.5 (34, 79)             | 62 (22, 80)                    |
| Gender, n (%)                               | Male                                   | 17 (54.8)             | 162 (62.3)                 | 9 (52.9)              | 79 (62.2)                  | 8 (57.1)                  | 83 (62.4)                      |
|                                             | Female                                 | 14 (45.2)             | 98 (37.7)                  | 8 (47.1)              | 48 (37.8)                  | 6 (42.9)                  | 50 (37.6)                      |
| Race, n (%)                                 | American Indian/Alaska Native          | 0 (0)                 | 2 (0.8)                    | 0 (0)                 | 2 (1.6)                    | 0 (0)                     | 0 (0)                          |
|                                             | Asian                                  | 6 (19.4)              | 31 (11.9)                  | 3 (17.6)              | 22 (17.3)                  | 3 (21.4)                  | 9 (6.8)                        |
|                                             | Black/African American                 | 7 (22.6)              | 57 (21.9)                  | 4 (23.5)              | 27 (21.3)                  | 3 (21.4)                  | 30 (22.6)                      |
|                                             | Native Hawaiian/Other Pacific Islander | 1 (3.2)               | 3 (1.2)                    | 1 (5.9)               | 2 (1.6)                    | 0 (0)                     | 1 (0.8)                        |
|                                             | White/Caucasian                        | 17 (54.8)             | 164 (63.1)                 | 9 (52.9)              | 72 (56.7)                  | 8 (57.1)                  | 92 (69.2)                      |
|                                             | Unknown                                | 0 (0)                 | 2 (0.8)                    | 0 (0)                 | 1 (0.8)                    | 0 (0)                     | 1 (0.8)                        |
|                                             | Multiple                               | 0 (0)                 | 1 (0.4)                    | 0 (0)                 | 1 (0.8)                    | 0 (0)                     | 0 (0)                          |
| Ethnicity, n (%)                            | Hispanic Or Latino                     | 4 (12.9)              | 44 (16.9)                  | 1 (5.9)               | 20 (15.7)                  | 3 (21.4)                  | 24 (18)                        |
|                                             | Not Hispanic Or Latino                 | 27 (87.1)             | 216 (83.1)                 | 16 (94.1)             | 107 (84.3)                 | 11 (78.6)                 | 109 (82)                       |
| Glasgow Coma Scale Score, Median (Min, Max) |                                        | 15 (7, 15)            | 14 (7, 15)                 | 15 (9, 15)            | 14 (7, 15)                 | 15 (7, 15)                | 14 (8, 15)                     |
| NIHSS, Median (Min, Max)                    |                                        | 11 (5, 21)            | 13 (4, 31)                 | 13 (5, 19)            | 13 (4, 28)                 | 8.5 (6, 21)               | 13 (5, 31)                     |
| Intracerebral hemorrhage score <=2, n (%)   | No                                     | 1 (3.2)               | 13 (5)                     | 1 (5.9)               | 4 (3.1)                    | 0 (0)                     | 9 (6.8)                        |
|                                             | Yes                                    | 30 (96.8)             | 247 (95)                   | 16 (94.1)             | 123 (96.9)                 | 14 (100)                  | 124 (93.2)                     |
| Hypertension, n (%)                         | No                                     | 6 (19.4)              | 48 (18.5)                  | 3 (17.6)              | 28 (22)                    | 3 (21.4)                  | 20 (15)                        |
|                                             | Yes                                    | 25 (80.6)             | 212 (81.5)                 | 14 (82.4)             | 99 (78)                    | 11 (78.6)                 | 113 (85)                       |
| Diabetes mellitus, n (%)                    | No                                     | 24 (77.4)             | 192 (73.8)                 | 14 (82.4)             | 98 (77.2)                  | 10 (71.4)                 | 94 (70.7)                      |
|                                             | Yes                                    | 7 (22.6)              | 68 (26.2)                  | 3 (17.6)              | 29 (22.8)                  | 4 (28.6)                  | 39 (29.3)                      |
| Cardiac disease, n (%)                      | No                                     | 29 (93.5)             | 233 (89.6)                 | 17 (100)              | 113 (89)                   | 12 (85.7)                 | 120 (90.2)                     |
|                                             | Yes                                    | 2 (6.5)               | 27 (10.4)                  | 0 (0)                 | 14 (11)                    | 2 (14.3)                  | 13 (9.8)                       |
| Pulmonary disease, n (%)                    | No                                     | 20 (64.5)             | 214 (82.3)                 | 14 (82.4)             | 99 (78)                    | 6 (42.9)                  | 115 (86.5)                     |
|                                             | Yes                                    | 11 (35.5)             | 46 (17.7)                  | 3 (17.6)              | 28 (22)                    | 8 (57.1)                  | 18 (13.5)                      |

|                                                     |                   | All - Missing<br>n=31 | All - Not Missing<br>n=260 | DFO - Missing<br>n=17 | DFO - Not Missing<br>n=127 | Placebo - Missing<br>n=14 | Placebo - Not Missing<br>n=133 |
|-----------------------------------------------------|-------------------|-----------------------|----------------------------|-----------------------|----------------------------|---------------------------|--------------------------------|
| Previous ischemic stroke or TIA, n (%)              | No                | 30 (96.8)             | 235 (90.4)                 | 17 (100)              | 117 (92.1)                 | 13 (92.9)                 | 118 (88.7)                     |
|                                                     | Yes               | 1 (3.2)               | 25 (9.6)                   | 0 (0)                 | 10 (7.9)                   | 1 (7.1)                   | 15 (11.3)                      |
| Previous ICH, n (%)                                 | No                | 29 (93.5)             | 252 (96.9)                 | 16 (94.1)             | 121 (95.3)                 | 13 (92.9)                 | 131 (98.5)                     |
|                                                     | Yes               | 2 (6.5)               | 8 (3.1)                    | 1 (5.9)               | 6 (4.7)                    | 1 (7.1)                   | 2 (1.5)                        |
| Antiplatelet agents, n (%)                          | No                | 23 (74.2)             | 177 (68.1)                 | 14 (82.4)             | 88 (69.3)                  | 9 (64.3)                  | 89 (66.9)                      |
|                                                     | Yes               | 8 (25.8)              | 83 (31.9)                  | 3 (17.6)              | 39 (30.7)                  | 5 (35.7)                  | 44 (33.1)                      |
| Warfarin, n (%)                                     | No                | 31 (100)              | 258 (99.2)                 | 17 (100)              | 126 (99.2)                 | 14 (100)                  | 132 (99.2)                     |
|                                                     | Yes               | 0 (0)                 | 2 (0.8)                    | 0 (0)                 | 1 (0.8)                    | 0 (0)                     | 1 (0.8)                        |
| Antihypertensives, n (%)                            | No                | 5 (16.1)              | 42 (16.2)                  | 4 (23.5)              | 21 (16.5)                  | 1 (7.1)                   | 21 (15.8)                      |
|                                                     | Yes               | 26 (83.9)             | 218 (83.8)                 | 13 (76.5)             | 106 (83.5)                 | 13 (92.9)                 | 112 (84.2)                     |
| Statins, n (%)                                      | No                | 28 (90.3)             | 189 (72.7)                 | 16 (94.1)             | 90 (70.9)                  | 12 (85.7)                 | 99 (74.4)                      |
|                                                     | Yes               | 3 (9.7)               | 71 (27.3)                  | 1 (5.9)               | 37 (29.1)                  | 2 (14.3)                  | 34 (25.6)                      |
| Modified Rankin Scale score before ICH, n (%)       | 0                 | 27 (87.1)             | 233 (89.6)                 | 15 (88.2)             | 115 (90.6)                 | 12 (85.7)                 | 118 (88.7)                     |
|                                                     | 1                 | 4 (12.9)              | 27 (10.4)                  | 2 (11.8)              | 12 (9.4)                   | 2 (14.3)                  | 15 (11.3)                      |
| Blood glucose (mg/dL), Median (Min, Max)            |                   | 128 (79, 399)         | 136.5 (71, 487)            | 132 (79, 399)         | 134 (71, 317)              | 121 (94, 198)             | 138 (84, 487)                  |
| Systolic blood pressure (mmHg), Median (Min, Max)   |                   | 139 (105, 171)        | 136 (96, 189)              | 140 (105, 171)        | 134 (100, 189)             | 138.5 (105, 159)          | 138 (96, 172)                  |
| Diastolic blood pressure (mmHg), Median (Min, Max)  |                   | 73 (39, 100)          | 70 (40, 109)               | 74 (49, 93)           | 70 (40, 109)               | 72.5 (39, 100)            | 70 (41, 97)                    |
| Time from ICH to treatment (hrs), Median (Min, Max) |                   | 21.3 (5.4, 25.2)      | 17.7 (4.7, 26)             | 22.3 (6.6, 25.2)      | 16.7 (4.7, 25.7)           | 20.6 (5.4, 24)            | 19.5 (5.2, 26)                 |
| Time from ICH to treatment <=12h, n (%)             | No                | 23 (74.2)             | 178 (68.5)                 | 15 (88.2)             | 85 (66.9)                  | 8 (57.1)                  | 93 (69.9)                      |
|                                                     | Yes               | 8 (25.8)              | 82 (31.5)                  | 2 (11.8)              | 42 (33.1)                  | 6 (42.9)                  | 40 (30.1)                      |
| ICH location, n (%)                                 | Lobar             | 3 (9.7)               | 56 (21.5)                  | 2 (11.8)              | 24 (18.9)                  | 1 (7.1)                   | 32 (24.1)                      |
|                                                     | Thalamic          | 13 (41.9)             | 93 (35.8)                  | 7 (41.2)              | 38 (29.9)                  | 6 (42.9)                  | 55 (41.4)                      |
|                                                     | Deep Non-Thalamic | 15 (48.4)             | 111 (42.7)                 | 8 (47.1)              | 65 (51.2)                  | 7 (50)                    | 46 (34.6)                      |
| ICH volume (mL), Median (Min, Max)                  |                   | 8.8 (1.5, 41.4)       | 13.1 (0.1, 110.2)          | 8.9 (1.5, 41.4)       | 12.6 (0.1, 110.2)          | 7 (2.3, 20.2)             | 15.1 (0.9, 98.7)               |

|                                                          |     | <b>All -<br/>Missing<br/>n=31</b> | <b>All - Not<br/>Missing<br/>n=260</b> | <b>DFO -<br/>Missing<br/>n=17</b> | <b>DFO - Not<br/>Missing<br/>n=127</b> | <b>Placebo -<br/>Missing<br/>n=14</b> | <b>Placebo -<br/>Not<br/>Missing<br/>n=133</b> |
|----------------------------------------------------------|-----|-----------------------------------|----------------------------------------|-----------------------------------|----------------------------------------|---------------------------------------|------------------------------------------------|
| Intraventricular<br>hemorrhage, n (%)                    | No  | 19 (61.3)                         | 152 (58.5)                             | 12 (70.6)                         | 83 (65.4)                              | 7 (50)                                | 69 (51.9)                                      |
|                                                          | Yes | 12 (38.7)                         | 108 (41.5)                             | 5 (29.4)                          | 44 (34.6)                              | 7 (50)                                | 64 (48.1)                                      |
| Intraventricular<br>hemorrhage volume (mL),<br>Mean (SD) |     | 3.7 (6.6)                         | 4.3 (10.2)                             | 1.2 (2.1)                         | 4 (10.4)                               | 6.7 (8.8)                             | 4.6 (10.1)                                     |
